# Supplementary material for: The developmental environment modulates mating‐induced aggression and fighting success in adult female Drosophila
Source: PubMed Central journal article supplement (PMC6472669; doi:10.1111/1365-2435.13214), 2018-09-28
Supplement: FEC-32-2542-s002.pdf [file FEC-32-2542-s002.pdf]

## Appendix S1: Supplementary tables containing AIC evaluations of statistical models

**Supplementary Table 1.a: Feeding duration model comparisons**

| Model           | Terms included in the model                         | AIC    | Deviance |
|-----------------|-----------------------------------------------------|--------|----------|
| Null            | Intercept                                           | 6849.8 | 215.09   |
| Best            | FM + FD + CD                                        | 6837.6 | 206.59   |
| 2 <sup>nd</sup> | FM + FD                                             | 6840.6 | 208.31   |
| 3 <sup>rd</sup> | FM + FD + CD + CM                                   | 6837.7 | 206.59   |
| 4 <sup>th</sup> | FM + FD + CD + FD*CD                                | 6838.3 | 206.74   |
| 5 <sup>th</sup> | FM + FD + CD + FM*CD                                | 6838.4 | 206.76   |
| 6 <sup>th</sup> | FM + FD + CD + FM*FD                                | 6839.6 | 207.07   |
| Full            | All main effects and 2-, 3-, and 4-way interactions | 6855.1 | 204.28   |

**Legend:** FM = Focal mating status, FD = focal larval density, CM = Competitor mating status, CD = Competitor larval density, \* = interaction between factors.

The best model is highlighted in green, with models within 5 AICs highlighted in yellow, as they cannot be discounted as they are not significantly different from the best model.

**Supplementary Table 1.b: Model estimates from best model for feeding duration**

|    | Df | Estimate | SE     | Deviance | P-value |
|----|----|----------|--------|----------|---------|
| FM | 1  | -0.1896  | 0.0474 | 4.3975   | 0.00003 |
| FD | 1  | -0.1305  | 0.0482 | 2.3806   | 0.00200 |
| CD | 1  | -0.1066  | 0.0482 | 1.2304   | 0.02628 |

Estimates and standard errors are reported on a log-scale as that was the transformation used in the model. They have not been back-transformed. P-value indicates whether the factor had a significant effect on feeding duration. Degrees of freedom are added sequentially. Significant values at  $P < 0.05$  are highlighted in red. FM = Focal mating status, FD = focal larval density, CD = Competitor larval density

**Supplementary Table 2.a: Contest initiations model comparison**

| Model           | Terms included in the model                         | AIC    | Deviance |
|-----------------|-----------------------------------------------------|--------|----------|
| Null            | Intercept                                           | 1290.6 | 249.31   |
| Best            | CD + FD + FM + FM*FD                                | 1236.8 | 249.52   |
| 1 <sup>st</sup> | CD + FD + FM                                        | 1237.8 | 252.51   |
| 2 <sup>nd</sup> | CD + FD + FM + CM + FM*FD                           | 1237.9 | 248.59   |
| 3 <sup>rd</sup> | CD + FD + FM + FM*FD + FD*CD                        | 1238.2 | 248.85   |
| 4 <sup>th</sup> | CD + FD + FM + FM*FD + FM*CD                        | 1238.3 | 248.98   |
| Full            | All main effects and 2-, 3-, and 4-way interactions | 1243.0 | 249.66   |

**Legend:** FM = Focal mating status, FD = focal larval density, CM = Competitor mating status, CD = Competitor larval density, \* = interaction between factors.

The best model is highlighted in green, with models within 5 AICs highlighted in yellow, as they cannot be discounted as they are not significantly different from the best model.

**Supplementary Table 2.b: Model estimates from best model for contest initiations**

|         | Df | Estimate | SE     | Deviance | P-value   |
|---------|----|----------|--------|----------|-----------|
| CD      | 1  | -0.7234  | 0.1196 | 23.1496  | 0.000015  |
| FD      | 1  | 0.4577   | 0.1623 | 23.1582  | 0.000015  |
| FM      | 1  | -0.7472  | 0.1746 | 20.0707  | 0.000075  |
| FM * FD | 1  | 0.4053   | 0.2337 | 2.9931   | 0.0836200 |

Estimates and standard errors are reported on a log-scale as that was the transformation used in the model. They have not been back-transformed. Degrees of freedom are added sequentially. P-value indicates whether the factor had a significant effect on contest initiations. Significant values at  $P < 0.05$  are highlighted in red, and p-values below 0.1 are highlighted in yellow.

FM = Focal mating status, FD = focal larval density, CM = Competitor mating status, CD = Competitor larval density, \* = interaction between factors.

**Supplementary Table 3.a: Proportion of encounters won model comparison**

| Model            | Terms included in the model                                                     | qAIC  | Df |
|------------------|---------------------------------------------------------------------------------|-------|----|
| Null             | Intercept                                                                       | 791.8 | 1  |
| Best             | FD + FM + CD + CM + FD*FM + CD*CM                                               | 610.4 | 7  |
| 1 <sup>st</sup>  | FD + CD                                                                         | 612.6 | 3  |
| 2 <sup>nd</sup>  | FD + CD + CM                                                                    | 612.9 | 4  |
| 3 <sup>rd</sup>  | FD + FM + CD                                                                    | 613.1 | 4  |
| 4 <sup>th</sup>  | FD + CD + FD*CD                                                                 | 614.6 | 4  |
| 5 <sup>th</sup>  | FD + FM + CD + CM                                                               | 612.0 | 5  |
| 6 <sup>th</sup>  | FD + CD + CM + FD*CD                                                            | 614.8 | 5  |
| 7 <sup>th</sup>  | FD + FM + CD + CM + FD*FM                                                       | 611.8 | 6  |
| 8 <sup>th</sup>  | FD + FM + CD + CM + FM*CD                                                       | 614.0 | 6  |
| 9 <sup>th</sup>  | FD + FM + CD + CM + FM*CM                                                       | 614.0 | 6  |
| 10 <sup>th</sup> | FD + FM + CD + CM + FD*CD                                                       | 614.0 | 6  |
| 11 <sup>th</sup> | FD + FM + CD + CM + FD*CM                                                       | 613.8 | 6  |
| 12 <sup>th</sup> | FD + FM + CD + CM + CD*CM                                                       | 612.2 | 6  |
| 13 <sup>th</sup> | FD + FM + CD + CM + FD*FM + FD*CM                                               | 613.0 | 7  |
| 14 <sup>th</sup> | FD + FM + CD + CM + FD*FM + FM*CD                                               | 613.5 | 7  |
| 15 <sup>th</sup> | FD + FM + CD + CM + FD*FM + FD*CD                                               | 613.8 | 7  |
| 16 <sup>th</sup> | FD + FM + CD + CM + FD*FM + FM*CM                                               | 613.8 | 7  |
| 17 <sup>th</sup> | FD + FM + CD + CM + FD*FM + FD*CM + CD*CM                                       | 612.3 | 8  |
| 18 <sup>th</sup> | FD + FM + CD + CM + FD*FM + FM*CD + CD*CM                                       | 612.3 | 8  |
| 19 <sup>th</sup> | FD + FM + CD + CM + FD*FM + FD*CD + CD*CM                                       | 612.4 | 8  |
| 20 <sup>th</sup> | FD + FM + CD + CM + FD*FM + FM*CM + CD*CM                                       | 612.4 | 8  |
| 21 <sup>st</sup> | FD + FM + CD + CM + FD*FM + FD*CM + FM*CM + FM*CD + CD*CM + FD*FM*CM + FM*CD*CM | 614.4 | 12 |
| Full             | All main effects and 2-, 3-, and 4-way interactions                             | 622.1 | 16 |

**Legend:** FM = Focal mating status, FD = focal larval density, CM = Competitor mating status, CD = Competitor larval density, \* = interaction between factors.

The best model is highlighted in green, with models within 5 qAICs highlighted in yellow, as they cannot be discounted as they are not significantly different from the best model.

**Supplementary Table 3.b: Model estimates for best proportion won model**

|         | Df | Estimate | SE     | Deviance | P-value |
|---------|----|----------|--------|----------|---------|
| FD      | 1  | 1.3446   | 0.2106 | 539.71   | < 2e-16 |
| FM      | 1  | -0.5921  | 0.2334 | 16.67    | 0.12701 |
| CD      | 1  | -1.3713  | 0.2118 | 789.08   | < 2e-16 |
| CM      | 1  | 0.5558   | 0.2327 | 20.42    | 0.09119 |
| FD * FM | 1  | 0.6390   | 0.3227 | 16.86    | 0.12476 |
| CD * CM | 1  | -0.5731  | 0.3220 | 22.84    | 0.07405 |

Estimates and standard errors are reported on a log-scale as that was the transformation used in the model. They have not been back-transformed. Degrees of freedom are added sequentially. P-value indicates whether the factor had a significant effect on the proportion of encounters won. Significant values at  $P < 0.05$  are highlighted in red, and p-values below 0.1 are highlighted in yellow. FM = Focal mating status, FD = focal larval density, CM = Competitor mating status, CD = Competitor larval density, \* = interaction between factors.

**Supplementary Table 4.a: Contest duration model comparison**

| Model            | Terms included in the model                                                                        | AIC    | Deviance |
|------------------|----------------------------------------------------------------------------------------------------|--------|----------|
| Null             | Intercept                                                                                          | 1394.8 | 131.57   |
| Best             | FM + CM + CD + FM*CD                                                                               | 1369.5 | 114.66   |
| 1 <sup>st</sup>  | FM + CM + CD + FM*CD + FM*CM                                                                       | 1370.5 | 114.21   |
| 2 <sup>nd</sup>  | FM + CM + CD                                                                                       | 1371.1 | 116.42   |
| 3 <sup>rd</sup>  | FM + FD + CM + CD + FM*CD                                                                          | 1371.3 | 114.57   |
| 4 <sup>th</sup>  | FM + CM + CD + FM*CD + CM*CD                                                                       | 1371.3 | 114.59   |
| 5 <sup>th</sup>  | FM + FD + CD + CM + FM*FD + FM*CD + FD*CD + FM*CM + FD*CM + CD*CM + FM*FD*CD + FM*CD*CM            | 1369.6 | 107.34   |
| 6 <sup>th</sup>  | FM + FD + CD + CM + FM*FD + FM*CD + FD*CD + FM*CM + CD*CM + FM*FD*CD + FM*CD*CM                    | 1369.9 | 108.44   |
| 7 <sup>th</sup>  | FM + FD + CD + CM + FM*FD + FM*CD + FD*CD + FM*CM + FD*CM + CD*CM + FM*FD*CD                       | 1370.0 | 108.51   |
| 8 <sup>th</sup>  | FM + FD + CD + CM + FM*FD + FM*CD + FD*CD + FM*CM + FD*CM + CD*CM + FM*FD*CD + FM*CD*CM + FD*CD*CM | 1370.8 | 106.94   |
| 9 <sup>th</sup>  | FM + FD + CD + CM + FM*FD + FM*CD + FD*CD + FM*CM + FD*CM + CD*CM + FM*FD*CD + FM*CD*CM + FM*FD*CM | 1371.3 | 107.19   |
| 10 <sup>th</sup> | FM + FD + CD + CM + FM*FD + FM*CD + FD*CD + FM*CM + FD*CM + CD*CM + FM*CD*CM                       | 1374.8 | 110.89   |
| Full             | All main effects and 2-, 3-, and 4-way interactions                                                | 1374.0 | 106.61   |

**Legend:** FM = Focal mating status, FD = focal larval density, CM = Competitor mating status, CD = Competitor larval density, \* = interaction between factors.

The best model is highlighted in green, with models within 5 qAICs highlighted in yellow, as they cannot be discounted as they are not significantly different from the best model.

**Supplementary Table 4.b: Model estimates for best contest duration model**

|         | Df | Estimate | SE      | Deviance | Pr(>Chi) |
|---------|----|----------|---------|----------|----------|
| FM      | 1  | -0.5145  | 0.13706 | 8.6977   | 0.00002  |
| CM      | 1  | -0.3074  | 0.09538 | 5.2184   | 0.00102  |
| CD      | 1  | -0.3330  | 0.13531 | 1.2380   | 0.10964  |
| FM * CD | 1  | 0.3587   | 0.18886 | 1.7624   | 0.05629  |

Estimates and standard errors are reported on a log-scale as that was the transformation used in the model. They have not been back-transformed. Degrees of freedom are added sequentially. P-value indicates whether the factor had a significant effect on contest duration. Significant values at  $P < 0.05$  are highlighted in red, and p-values below 0.1 are highlighted in yellow. FM = Focal mating status, FD = focal larval density, CM = Competitor mating status, CD = Competitor larval density, \* = interaction between factors.

**Supplementary Table 4.c: Model estimates for full contest duration model**

|                   | Df | Estimate | SE      | Deviance | P-value |
|-------------------|----|----------|---------|----------|---------|
| FM                | 1  | -0.81288 | 0.24138 | 8.6977   | 0.00003 |
| FD                | 1  | 0.11217  | 0.29149 | 0.0348   | 0.79157 |
| CD                | 1  | -0.24991 | 0.24138 | 1.4302   | 0.09023 |
| CM                | 1  | 0.11091  | 0.32517 | 5.0254   | 0.00150 |
| FM * FD           | 1  | 0.52960  | 0.40730 | 0.7361   | 0.22428 |
| FM * CD           | 1  | 0.68567  | 0.36798 | 1.5590   | 0.07698 |
| FD * CD           | 1  | -0.02589 | 0.38144 | 1.1201   | 0.13387 |
| FM * CM           | 1  | -0.20915 | 0.40630 | 0.7042   | 0.23462 |
| FD * CM           | 1  | -0.71575 | 0.46679 | 0.9430   | 0.16900 |
| CD * CM           | 1  | -0.49073 | 0.42065 | 0.0001   | 0.98973 |
| FM * FD * CD      | 1  | -1.10974 | 0.57469 | 2.8111   | 0.01756 |
| FM * FD * CM      | 1  | 0.38164  | 0.59319 | 0.2800   | 0.45356 |
| FM * CD * CM      | 1  | 0.62213  | 0.61443 | 1.0453   | 0.14760 |
| FD * CD * CM      | 1  | 0.49093  | 0.58929 | 0.5751   | 0.28276 |
| FD * FM * CD * CM | 1  | -0.08196 | 0.83948 | 0.0048   | 0.92219 |

Estimates and standard errors are reported on a log-scale as that was the transformation used in the model. They have not been back-transformed. Degrees of freedom are added sequentially. P-value indicates whether the factor had a significant effect on contest duration. Significant values at  $P < 0.05$  are highlighted in red, and p-values below 0.1 are highlighted in yellow. FM = Focal mating status, FD = focal larval density, CM = Competitor mating status, CD = Competitor larval density, \* = interaction between factors.
